# Supplementary material for: Identification and Regulation of Interleukin-17 (IL-17) Family Ligands in the Teleost Fish European Sea Bass
Source: PubMed Central journal article supplement (PMC7178287; doi:10.3390/ijms21072439), 2020-03-31
Supplement: ijms-21-02439-s001.pdf [file ijms-21-02439-s001.pdf]

**Supplementary Table 1.** Primers used for analysis of gene expression by real-time PCR in this study.

| <b>Name</b>               | <b>Gene</b>  | <b>Fw 5'-3'</b>      | <b>Rev 5'-3'</b>     | <b>Accession number</b> |
|---------------------------|--------------|----------------------|----------------------|-------------------------|
| Interleukin-17A/F1        | IL-17A/F1    | GACTCAGAGGGCAGAGAGGA | CGGTAGTGGTAGCTGTTCCC | AIK66536                |
| Interleukin-17A/F2        | IL-17A/F2    | AACTCGGTCCCCATCTACCA | TTTGGCCCAGACACAGGTAC | AIK66537                |
| Interleukin-17A/F3        | IL-17A/F3    | CCAGGTCCTAGTCCTCCACA | TATCACCTCCGTCCCCAGTT | AIK66540                |
| Interleukin-17C1          | IL-17C1      | CTGTGTTCCGGATGCATCCT | CTGCAGAGCTCCCTCTTGAG | AIK66538                |
| Interleukin-17C2          | IL-17C2      | GTCTGTCAGGGCTGCATCAT | TATTTATCGCGGTCGGTCGG | AIK66539                |
| Interleukin-17D           | IL-17D       | CGGTATCCACGCTACATCCC | AGGATCACAGAGGGAGCGTA | DLAgn_00055530          |
| Interleukin-17N           | IL-17N       | GAGTGCCTCAGGTCATCCAC | TTTCTTGAGGACAGGCACCC | DLAgn_00124370          |
| Elongation factor 1 alpha | Ef1 $\alpha$ | TCCCTGGAGAAGAGCTACGA | AGGAAGGAAGGCTGGAAAAG | AJ537421                |
| Ribosomal protein S18     | 18S          | TTCTTTGATCGCTCTTAACG | TCTGATAAATGCACGCATCC | AY831388                |
